# Supplementary material for: Use of homoserinyl γ-aldehyde–containing peptides in solid-phase reductive amination
Source: Royal Society of Chemistry journal article supplement (doi:10.1039/d5ob01718a), 2026-01-01
Supplement: d5ob01718a1.pdf [file d5ob01718a1.pdf]

## Use of Homoserinyl $\gamma$ -Aldehyde-Containing Peptides in Solid-Phase Reductive Amination

Dimitrios Tolis,<sup>a</sup> Dimitra Magkafa<sup>a</sup> and Spyridon Mourtas<sup>\*,a</sup>

<sup>a</sup> Department of Chemistry, University of Patras, 26510 Rio Patras, Greece.

E-mail: s.mourtas@upatras.gr

### HPLC and NMR data

#### 1. Synthesis of peptide aldehydes

##### 1.1. HPLC data

#### Peptide 9a

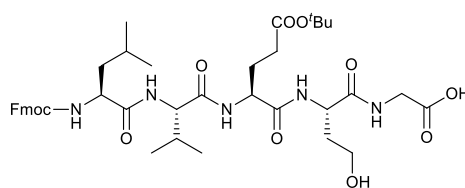

**9a:** Fmoc-Leu-Val-Glu(<sup>t</sup>Bu)-Hse-Gly-OH

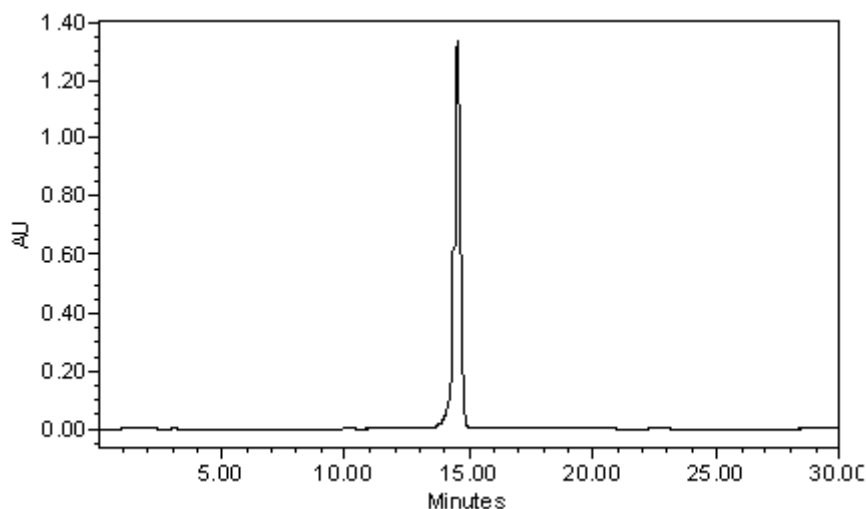

**Figure S1:** Analytical HPLC of crude Fmoc-Leu-Val-Glu(<sup>t</sup>Bu)-Hse-Gly-OH (**9a**); column: Purospher RP-8e, 5  $\mu$ m, 250-4 mm; gradient: 20% to 100% AcCN in water (both containing 0.08% TFA) in 30 min; flow rate: 1 mL/min; UV detection at 265 nm;  $t_R$  = 14.1 min (**9a**). The eluted peak was collected and subjected to ESI-MS  $m/z$ : 9:  $[M+H]^+$  calc.: 796.41 found: 796.43.

### Peptide 10

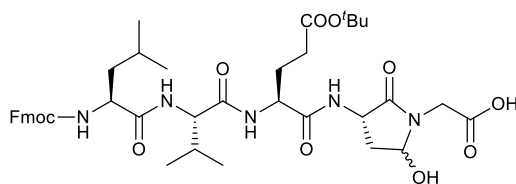

**10:** γ-hydroxy lactam peptide;  
Derived from Fmoc-Leu-Val-Glu(<sup>t</sup>Bu)-Hse(AL)-Gly-OH

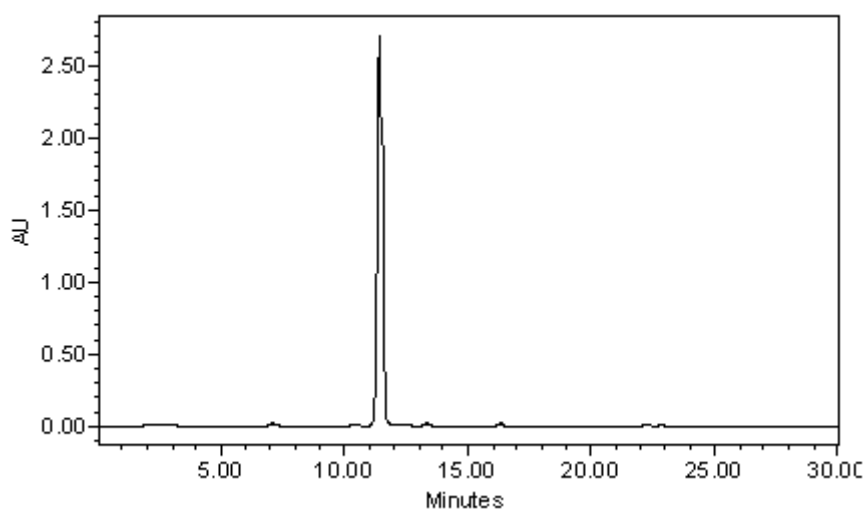

**Figure S2:** Analytical HPLC of crude γ-hydroxy lactam peptide **10**; column: Lichrosphere RP-18, 5 μm, 125–4 mm; gradient: 40% to 100% AcCN in water (both containing 0.08% TFA) in 30 min; flow rate: 1 mL/min; UV detection at 265 nm;  $t_R$  = 11.2 min (**10**). The eluted peak was collected and subjected to ESI-MS:  $m/z$   $[M+H]^+$  calc.: 794.40; found: 794.40.

### Peptide 9b

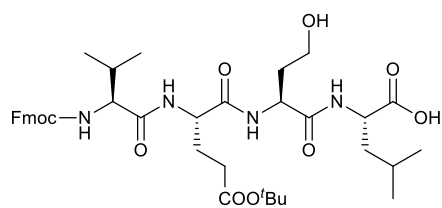

**9b:** Fmoc-Val-Glu(<sup>t</sup>Bu)-Hse-Leu-OH

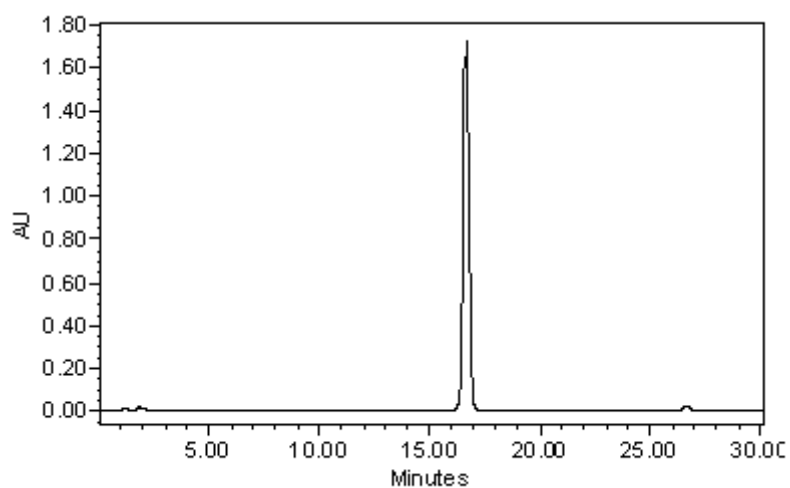

**Figure S3:** Analytical HPLC of crude Fmoc-Val-Glu(<sup>t</sup>Bu)-Hse-Leu-OH (**9b**); column: Lichrosphere RP-18, 5  $\mu$ m, 125–4 mm; gradient: 20% to 100% AcCN in water (both containing 0.08% TFA) in 30 min; flow rate: 1 mL/min; UV detection at 265 nm;  $t_R$  = 16.4 min (**9b**). The eluted peak was collected and subjected to ESI-MS:  $m/z$   $[M+H]^+$  calc. 739.39; found: 739.40.

### Peptide 11

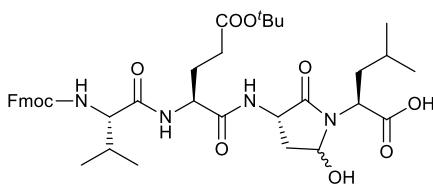

**11:**  $\gamma$ -hydroxy lactam of Fmoc-Val-Glu(<sup>t</sup>Bu)-Hse(AL)-Leu-OH

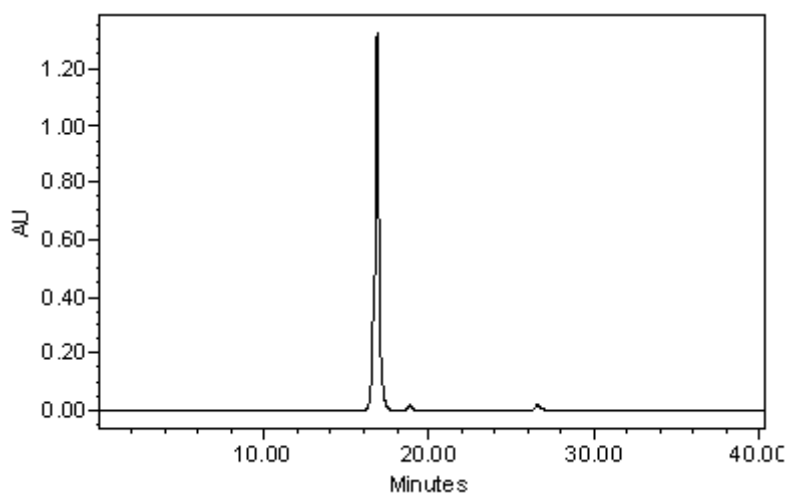

**Figure S4:** Analytical HPLC of crude  $\gamma$ -hydroxy lactam peptide **11**; column: Lichrosphere RP-18, 5  $\mu$ m, 125–4 mm; gradient: 20% to 100% AcCN in water (both containing 0.08% TFA) in 30 min; flow rate: 1 mL/min; UV detection at 265 nm;  $t_R$  = 16.6 min (**11**). The eluted peak was collected and subjected to ESI-MS:  $m/z$   $[M+H]^+$  calc. 737.38; found: 737.39.

### Peptide 13

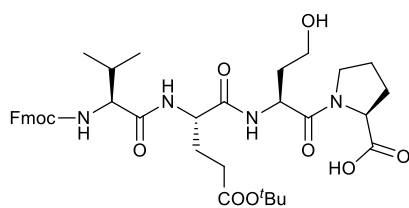

**13:** Fmoc-Val-Glu(<sup>t</sup>Bu)-Hse-Pro-OH

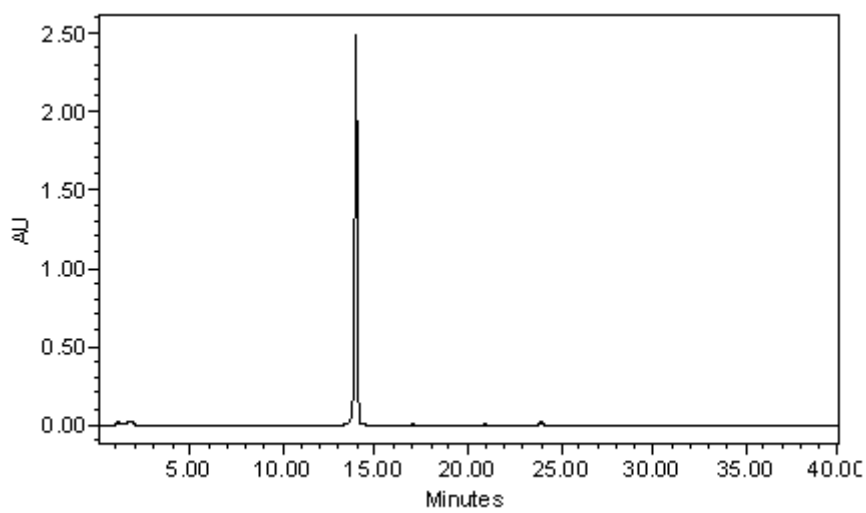

**Figure S5:** Analytical HPLC of crude Fmoc-Val-Glu(<sup>t</sup>Bu)-Hse-Pro-OH (**13**); column: Lichrosphere RP-18, 5  $\mu$ m, 125–4 mm; gradient: 20% to 100% AcCN in water (both containing 0.08% TFA) in 30 min; flow rate: 1 mL/min; UV detection at 265 nm;  $t_R$  = 13.8 min (**13**). The eluted peak was collected and subjected to ESI-MS:  $m/z$   $[M+H]^+$  calc. 723.36 found: 723.37.

### Peptide 14

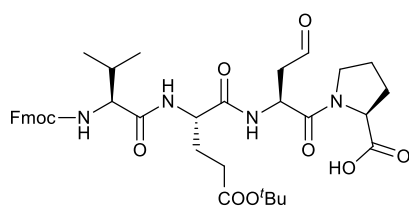

**14:** Fmoc-Val-Glu(<sup>t</sup>Bu)-Hse(AL)-Pro-OH

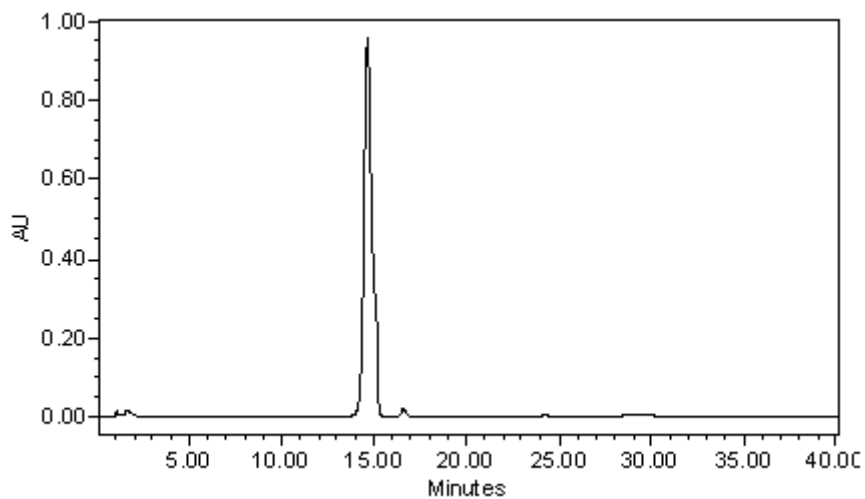

**Figure S6:** Analytical HPLC of crude Fmoc-Val-Glu(<sup>t</sup>Bu)-Hse-Pro-OH (**14**); column: Lichrosphere RP-18, 5  $\mu$ m, 125–4 mm; gradient: 20% to 100% AcCN in water (both containing 0.08% TFA) in 30 min; flow rate: 1 mL/min; UV detection at 265 nm;  $t_R$  = 14.3 min (**14**). The eluted peak was collected and subjected to ESI-MS:  $m/z$   $[M+H]^+$  calc. 721.34; found: 721.35.

## Peptide 16, 17

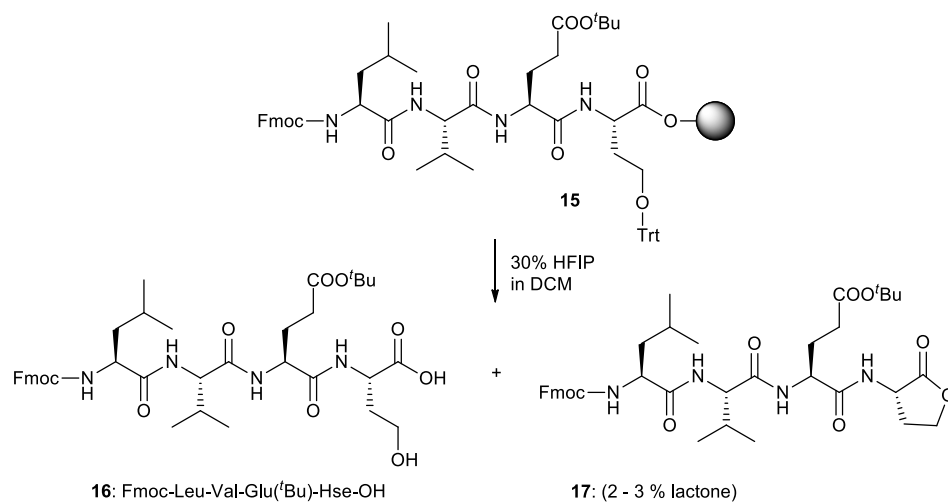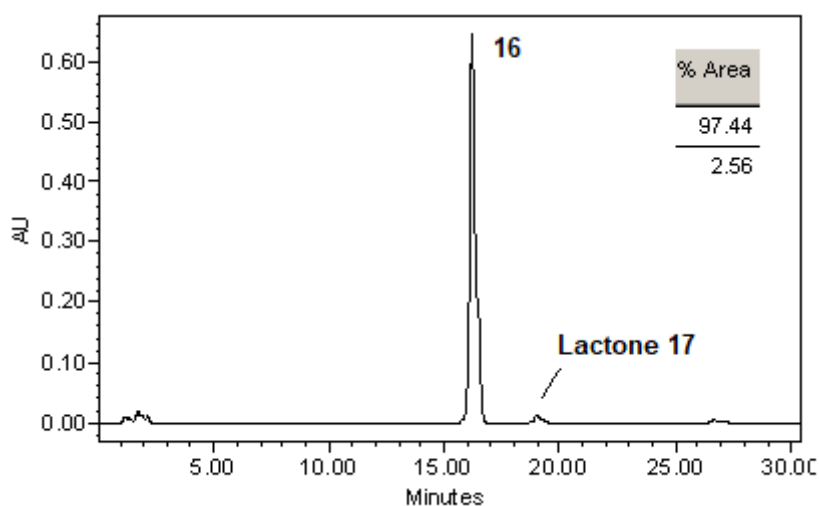

**Figure S7:** Analytical HPLC of crude Fmoc-Leu-Val-Glu(<sup>t</sup>Bu)-Hse-OH (**16**); column: Lichrosphere RP-18, 5  $\mu$ m, 125–4 mm; gradient: 20% to 100% AcCN in water (both containing 0.08% TFA) in 30 min; flow rate: 1 mL/min; UV detection at 265 nm;  $t_R$  = 16.3 min (**16**), 18.9 min (**17**). The eluted peaks were collected and subjected to ESI-MS. **16**:  $m/z$   $[M+H]^+$  calc. 739.39; found: 739.41 **17**:  $m/z$   $[M+H]^+$  calc. 721.38; found: 721.39.

## Peptide 18, 19

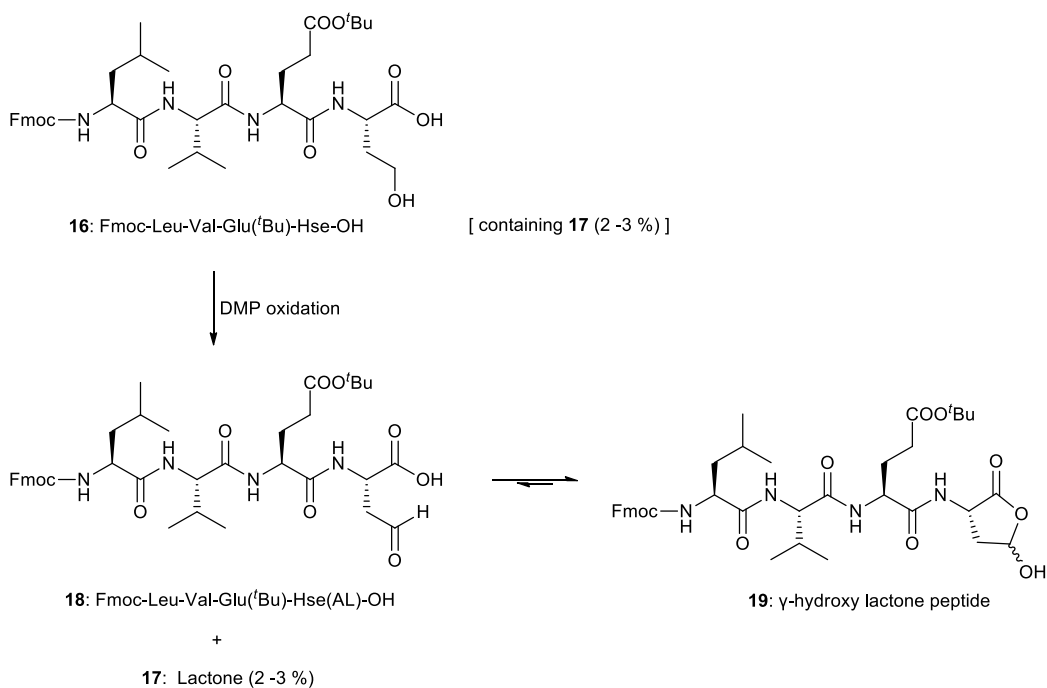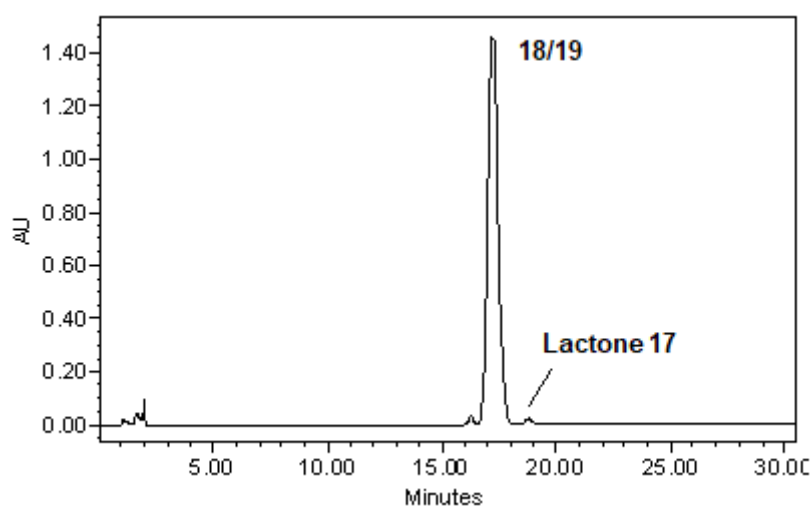

**Figure S8:** Analytical HPLC of crude  $\gamma$ -hydroxy lactone peptide (**18**) (derived from Fmoc-Leu-Val-Glu(<sup>t</sup>Bu)-Hse(AL)-OH peptide **18**); column: Lichrosphere RP-18, 5  $\mu$ m, 125–4 mm; gradient: 20% to 100% AcCN in water (both containing 0.08% TFA) in 30 min; flow rate: 1 mL/min; UV detection at 265 nm;  $t_R$  = 16.9 min (**18/19**). The eluted peaks were collected and subjected to ESI-MS. **18/19:**  $m/z$   $[M+H]^+$  calc. 737.38; found: 737.39.



**Peptide 20 [containing ~10% lactone (17) and ~10% bis-<sup>t</sup>Bu product (21)]**

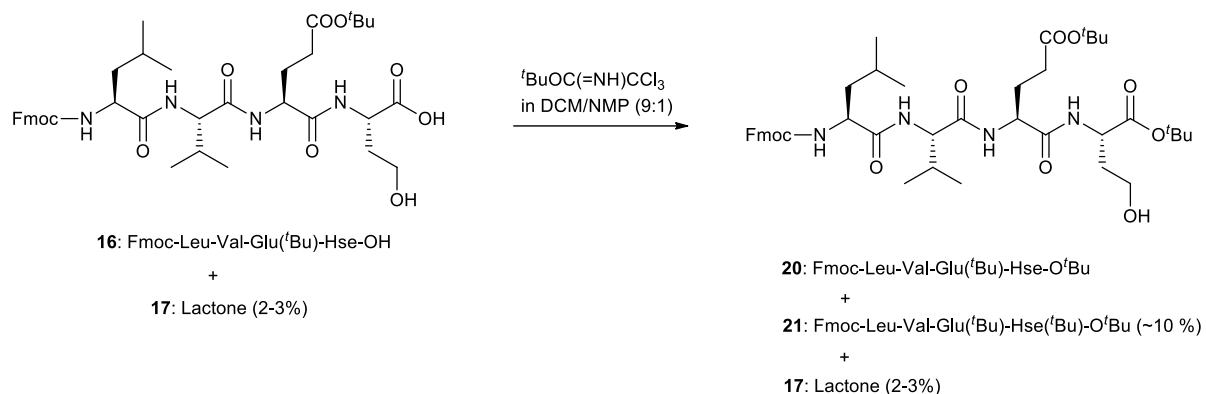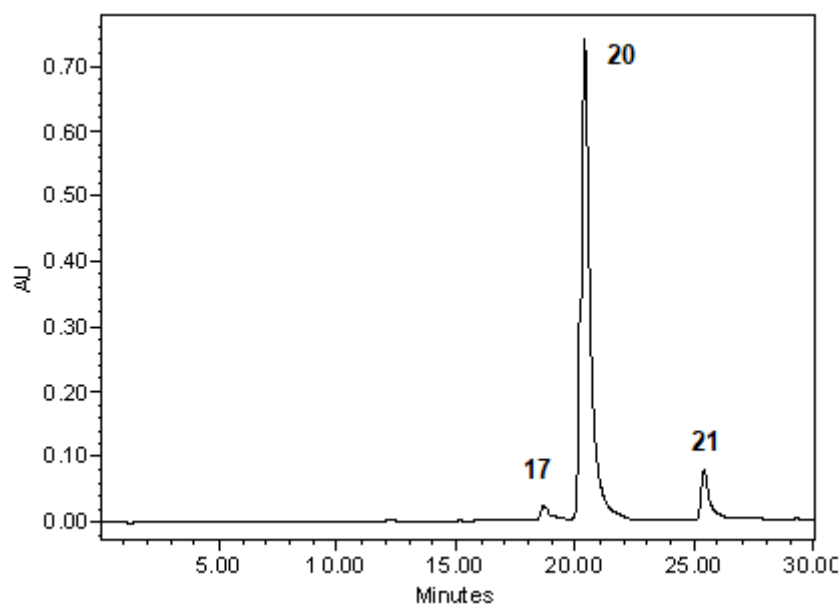

**Figure S9:** Analytical HPLC of Fmoc-Leu-Val-Glu(<sup>t</sup>Bu)-Hse-O<sup>t</sup>Bu (**20**) (containing 2–3% lactone **17** and 10% bis-O<sup>t</sup>Bu **21**); column: Lichrosphere RP-18, 5  $\mu$ m, 125–4 mm; gradient: 20% to 100% AcCN in water (both containing 0.08% TFA) in 30 min; flow rate: 1 mL/min; UV detection at 265 nm; 18.9 min (**17**), 20.9 min (**20**), 25.9 min (**21**); The eluted peaks were collected and subjected to ESI-MS. **20:** m/z [M+H]<sup>+</sup> calc. 795.45; found: 795.44; **21:** m/z [M+H]<sup>+</sup> calc. 851.52; found: 851.51.

## Peptide 22

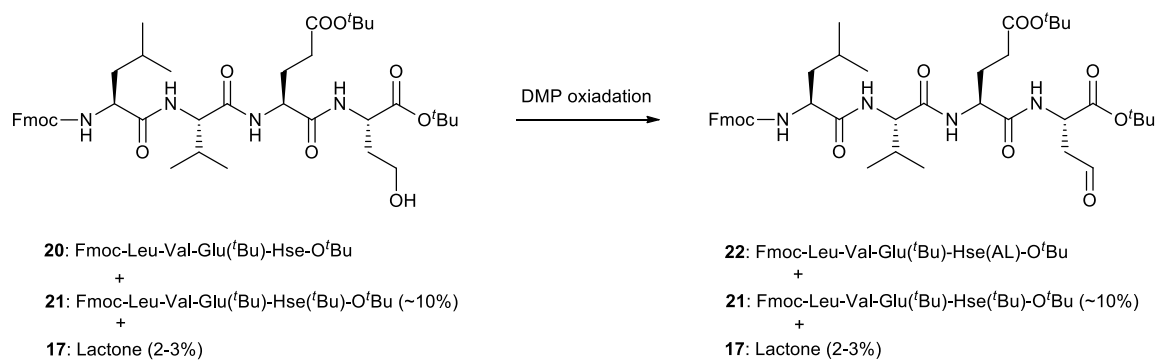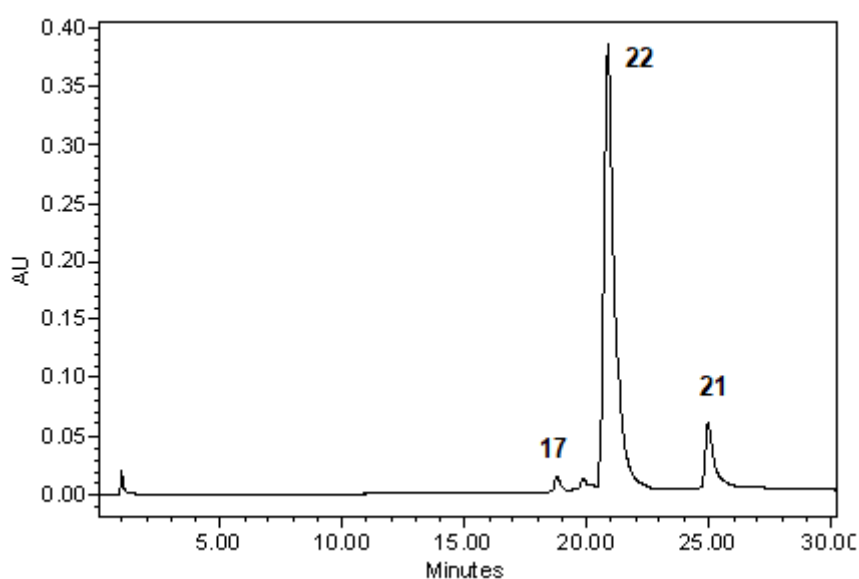

**Figure S10:** Analytical HPLC of Fmoc-Leu-Val-Glu(<sup>t</sup>Bu)-Hse(AL)-O<sup>t</sup>Bu (**22**) (containing ~10% lactone **17** and bis-O<sup>t</sup>Bu **21**); column: Lichrosphere RP-18, 5  $\mu$ m, 125–4 mm; gradient: 20% to 100% AcCN in water (both containing 0.08% TFA) in 30 min; flow rate: 1 mL/min; UV detection at 265 nm; 18.9 min (**17**), 21.5 min (**22**), 25.9 min (**21**); The eluted peaks were collected and subjected to ESI-MS. **22**: m/z [M+H]<sup>+</sup> calc. 793.44; found: 793.44.

## 1.2. $^1\text{H}$ / $^{13}\text{C}$ -NMR data

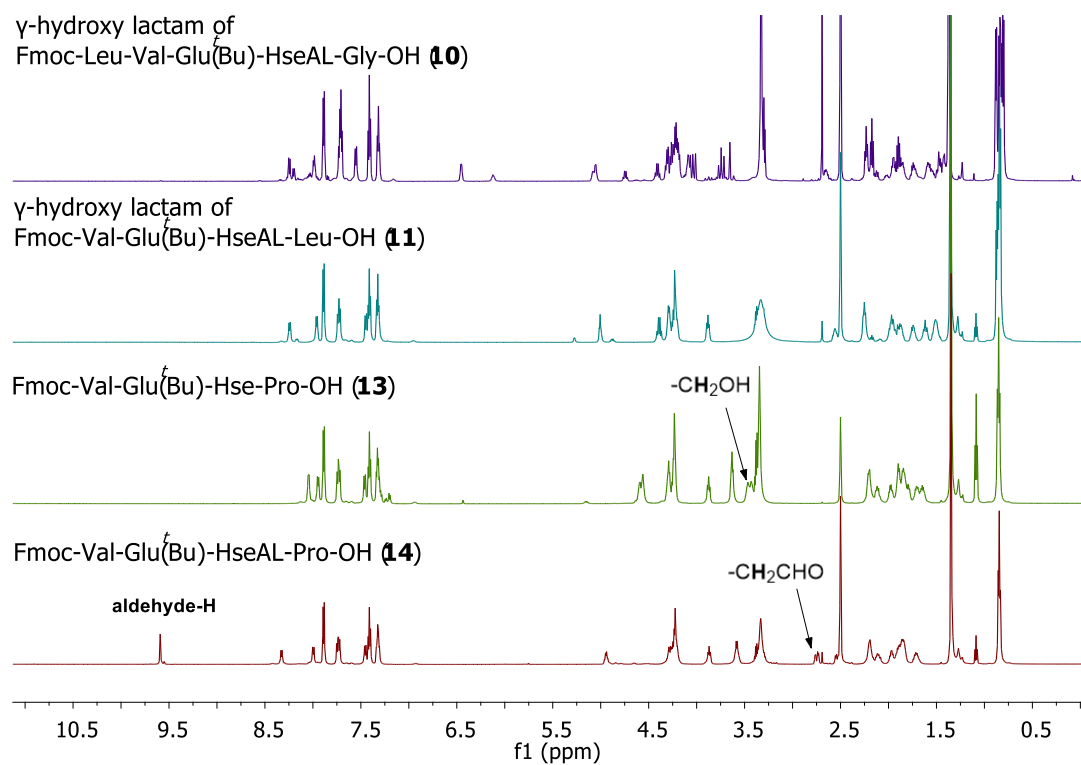

**Figure S11:**  $^1\text{H}$ -NMR (DMSO- $\text{d}_6$ ) of  $\gamma$ -hydroxy lactam of Fmoc-Leu-Val-Glu(<sup>t</sup>Bu)-Hse(AL)-Gly-OH (**10**),  $\gamma$ -hydroxy lactam of Fmoc-Leu-Val-Glu(<sup>t</sup>Bu)-Hse(AL)-Leu-OH (**11**), Fmoc-Leu-Val-Glu(<sup>t</sup>Bu)-Hse-Pro-OH (**13**), Fmoc-Leu-Val-Glu(<sup>t</sup>Bu)-Hse(AL)-Pro-OH (**14**).

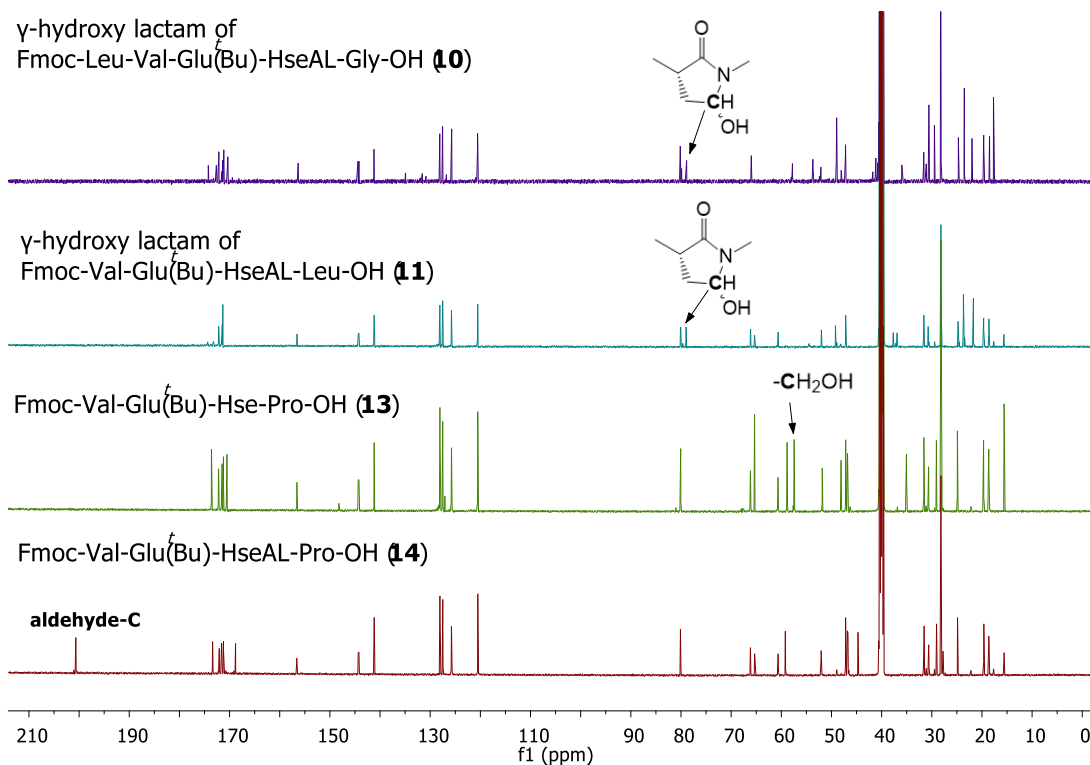

**Figure S12:**  $^{13}\text{C}$ -NMR (DMSO- $d_6$ ) of  $\gamma$ -hydroxy lactam of Fmoc-Leu-Val-Glu( $^t$ Bu)-Hse(AL)-Gly-OH (**10**),  $\gamma$ -hydroxy lactam of Fmoc-Leu-Val-Glu( $^t$ Bu)-Hse(AL)-Leu-OH (**11**), Fmoc-Leu-Val-Glu( $^t$ Bu)-Hse-Pro-OH (**13**), Fmoc-Leu-Val-Glu( $^t$ Bu)-Hse(AL)-Pro-OH (**14**).

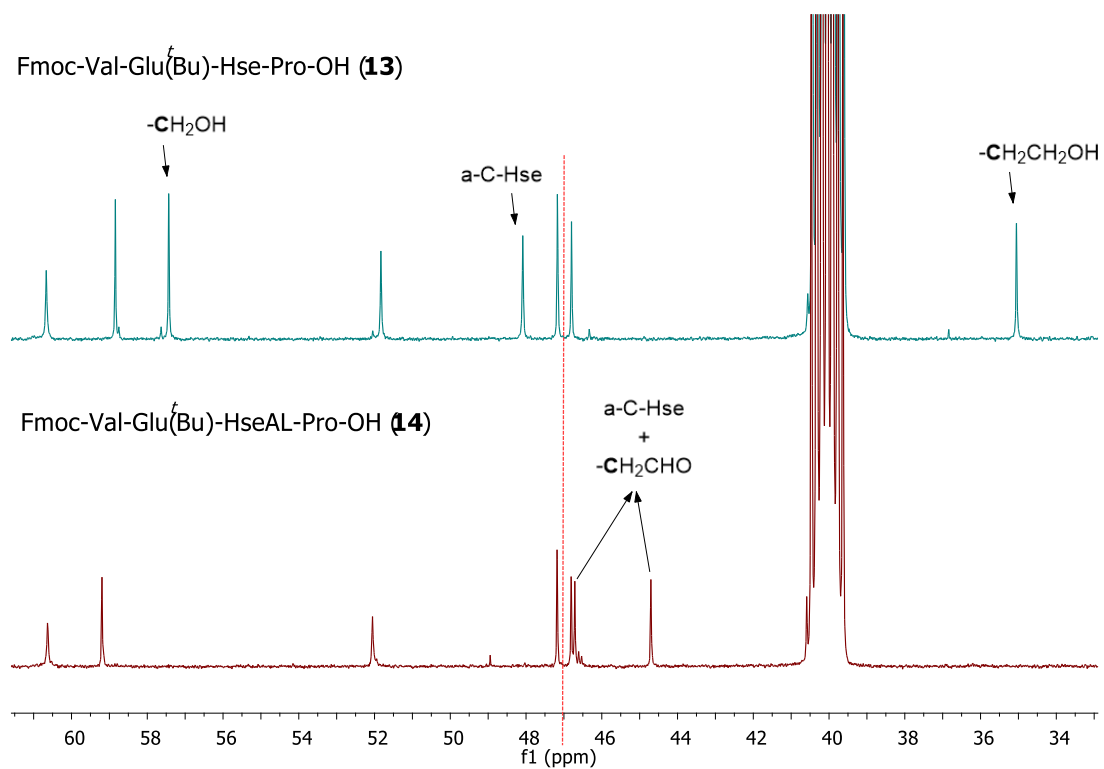

**Figure S13:**  $^{13}\text{C}$ -NMR (DMSO- $\text{d}_6$ ) (Expanded area 61–33 ppm) of Fmoc-Leu-Val-Glu( $^t\text{Bu}$ )-Hse-Pro-OH (**13**) and Fmoc-Leu-Val-Glu( $^t\text{Bu}$ )-Hse(AL)-Pro-OH (**14**).

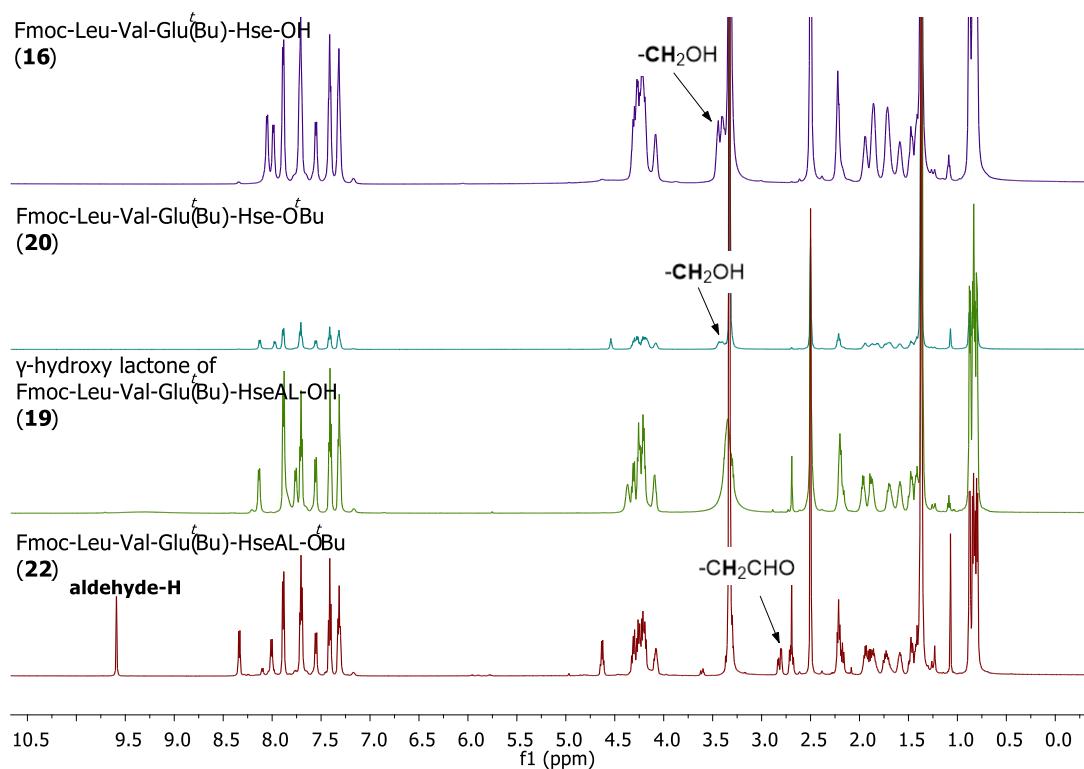

**Figure S14:**  $^1\text{H}$ -NMR (DMSO- $d_6$ ) of Fmoc-Leu-Val-Glu( $t\text{Bu}$ )-Hse-OH (**16**), Fmoc-Leu-Val-Glu( $t\text{Bu}$ )-Hse- $\text{O}^t\text{Bu}$  (**20**), C-terminal homoserinyl  $\gamma$ -aldehyde peptide (**18**) in equilibrium with the C-terminal  $\gamma$ -hydroxy lactone peptide (**19**), the  $t$ butylated C-terminal homoserinyl  $\gamma$ -aldehyde peptide (**22**).

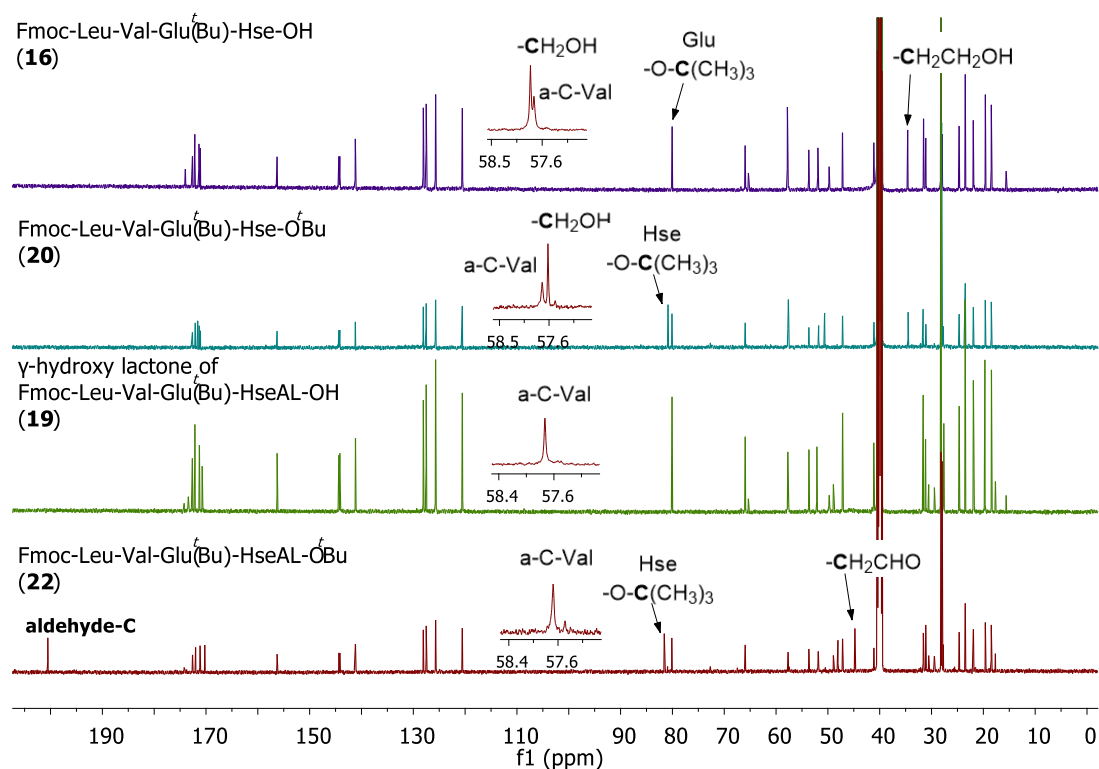

**Figure S15:**  $^{13}\text{C}$ -NMR (DMSO- $d_6$ ) of Fmoc-Leu-Val-Glu( $t$ Bu)-Hse-OH (**16**), Fmoc-Leu-Val-Glu( $t$ Bu)-Hse- $\text{O}^t\text{Bu}$  (**20**), C-terminal homoserinyl  $\gamma$ -aldehyde peptide (**18**) in equilibrium with the C-terminal  $\gamma$ -hydroxy lactone peptide **19**, the  $t$ butylated C-terminal homoserinyl  $\gamma$ -aldehyde peptide **22**.

## 2. Reductive Amination

### Reductive amination between 10, 11 and resin 23 (No products were formed)

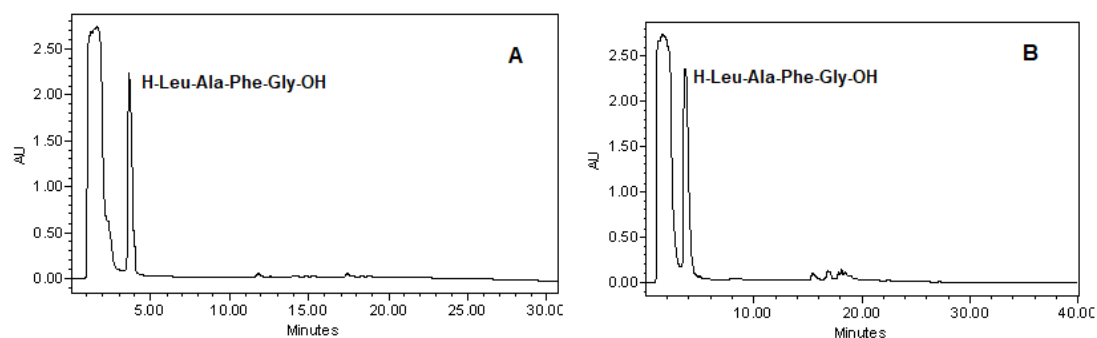

**Figure S16:** Analytical HPLC of the crude product obtained by the reductive amination of **10** and **11** with resin **23** (after cleavage from the resin); column: Lichrosphere RP-18, 5  $\mu$ m, 125–4 mm; gradient: 20% to 100% AcCN in water (both containing 0.08% TFA) in 30 min; flow rate: 1 mL/min; UV detection at 214 nm; No product was identified.



**Formation of peptide 27 (through reductive amination between 14 and resin 23)**

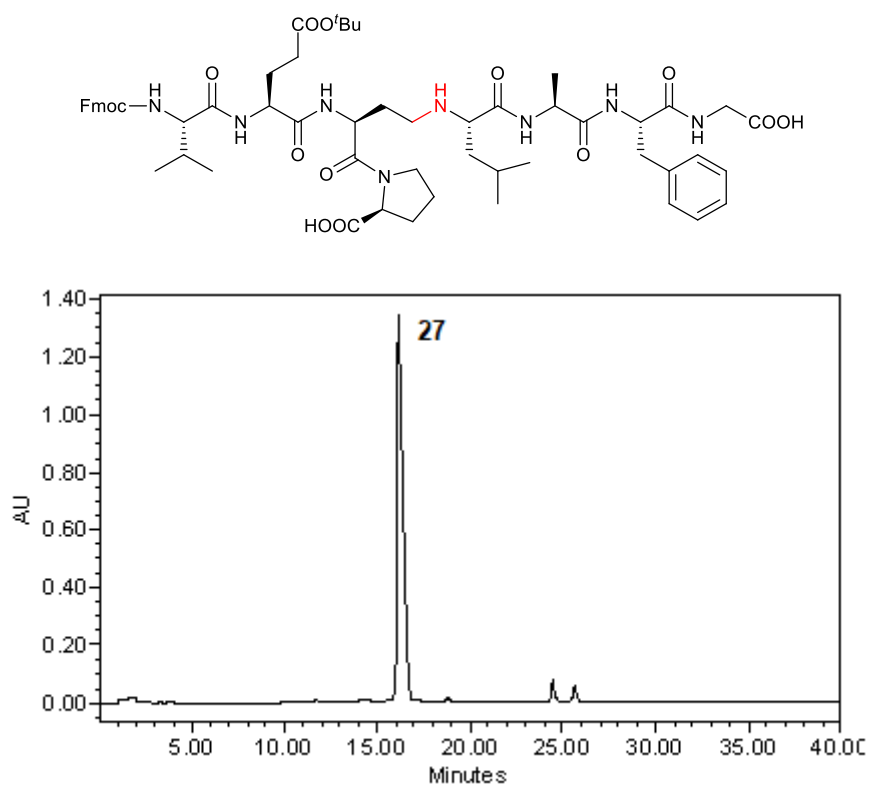

**Figure S17:** Analytical HPLC of crude Fmoc-Val-Glu(<sup>t</sup>Bu)-Hse(-Pro-OH)-β-ψ[CH<sub>2</sub>-NH]-Leu-Ala-Phe-Gly-OH (**27**); column: Lichrosphere RP-18, 5 μm, 125–4 mm; gradient: 20% to 100% AcCN in water (both containing 0.08% TFA) in 30 min; flow rate: 1 mL/min; UV detection at 265 nm; 15.9 min (**27**); The eluted peak was collected and subjected to ESI-MS: m/z [M+H]<sup>+</sup> calc. 1111.57; found: 1111.58.



**Peptide 30 (through reductive amination between 22 and resin 23)**

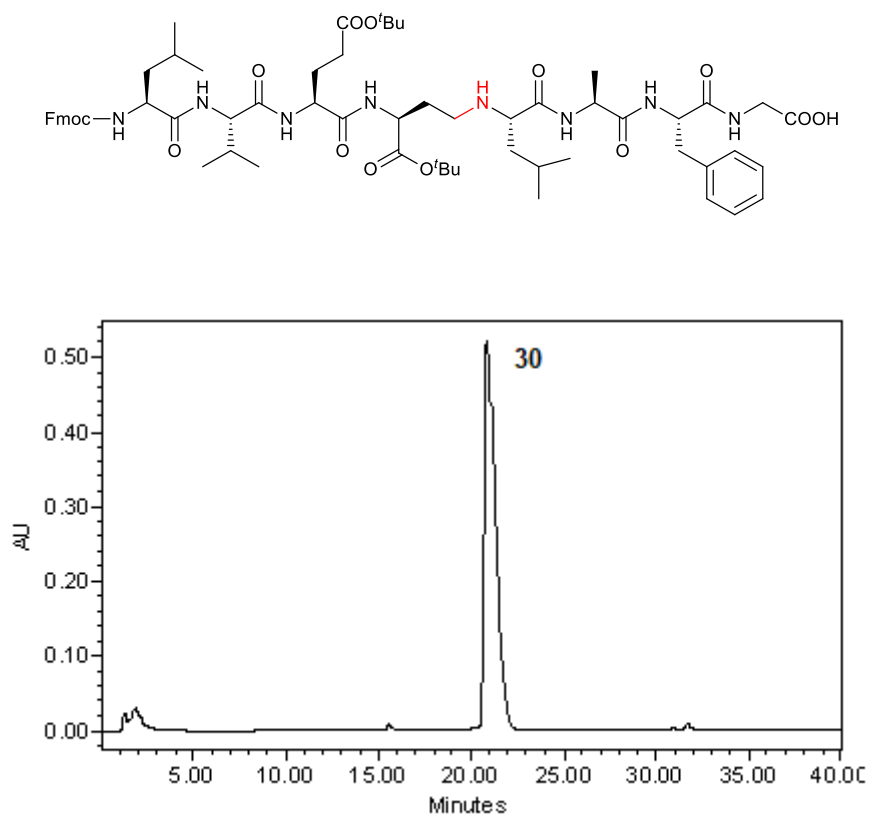

**Figure S19:** Analytical HPLC of peptide Fmoc-Leu-Val-Glu(<sup>t</sup>Bu)-Hse( $\alpha$ -<sup>t</sup>Bu)- $\beta$ - $\psi$ [CH<sub>2</sub>-NH]-Leu-Ala-Phe-Gly-OH (**30**) (obtained by the reductive amination of **22** with resin **23**); column: Lichrosphere RP-18, 5  $\mu$ m, 125–4 mm; gradient: 20% to 100% AcCN in water (both containing 0.08% TFA) in 30 min; flow rate: 1 mL/min; UV detection at 265 nm; 21.0 min (**30**); The eluted peak was collected and subjected to ESI-MS: m/z [M+H]<sup>+</sup> calc. 1183.67; found: 1183.69

### 3. Cleaved peptides from resins **32**, **33**, **34** and the corresponding non-Boc-protected precursors

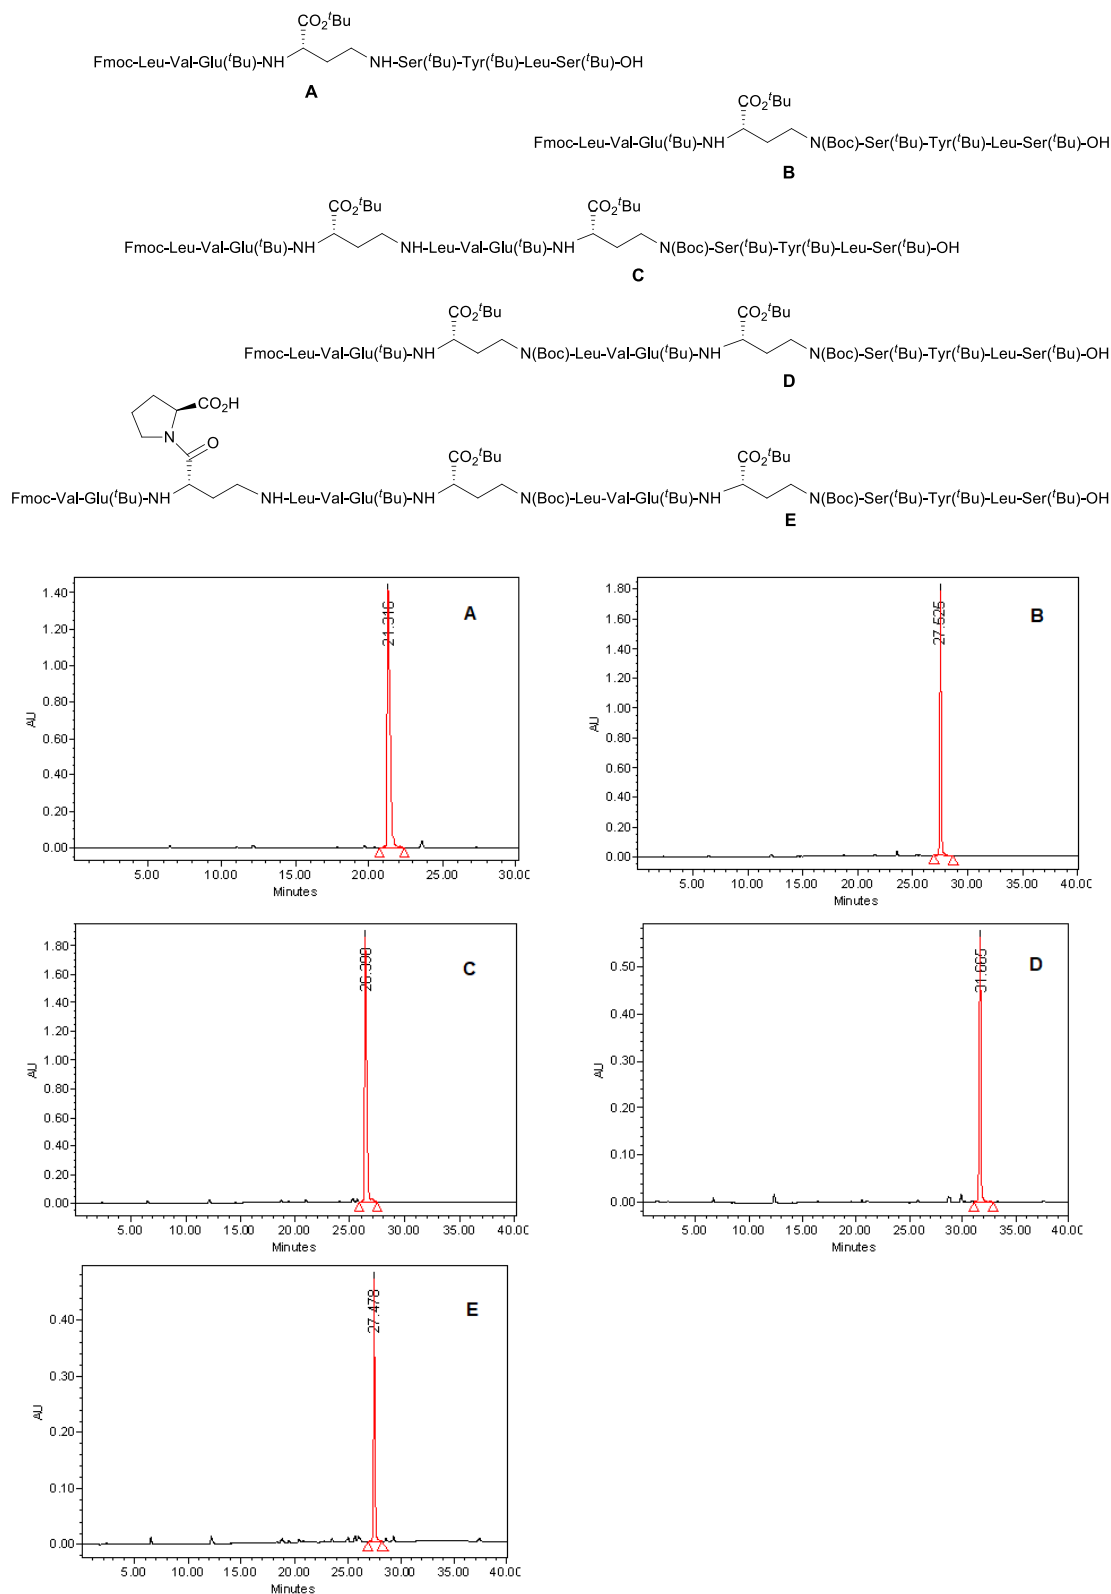

**Figure S20:** Analytical HPLC of the resin-cleaved crude peptides **A** – **E** during the synthesis of **34**, after treatment of the resins with DCM/TFE/AcOH (7:2:1); column: Column: Purospher RP-8e, 5  $\mu$ m, 125–4 mm; gradient: 20% to 100% AcCN in water (both containing 0.08% TFA) in 30 min; flow rate: 1 mL/min; UV

detection at 265 nm; The eluted peaks were collected and subjected to ESI-MS: **A**:  $m/z$   $[M+H]^+$  calc. 1413.85; found: 1413.82; **B**:  $m/z$   $[M+H]^+$  calc. 1513.91; found: 1513.89; **C**:  $m/z$   $[M+H]^+$  calc. 2068.27 and  $[M+2H]^{+2}$  1034.64; found:  $[M+H]^+$  2068.25 and  $[M+2H]^{+2}$  1034.61; **D**:  $m/z$   $[M+H]^+$  calc. 2168.33 and  $[M+2H]^{+2}$  1084.67; found:  $[M+H]^+$  2168.30 and  $[M+2H]^{+2}$  1084.69; **E**:  $m/z$   $[M+H]^+$  calc. 2650.60 and  $[M+2H]^{+2}$  1325.80; found:  $[M+H]^+$  2650.62 and  $[M+2H]^{+2}$  1325.79.

## 4. Lactone formation

### 4.1 HPLC data

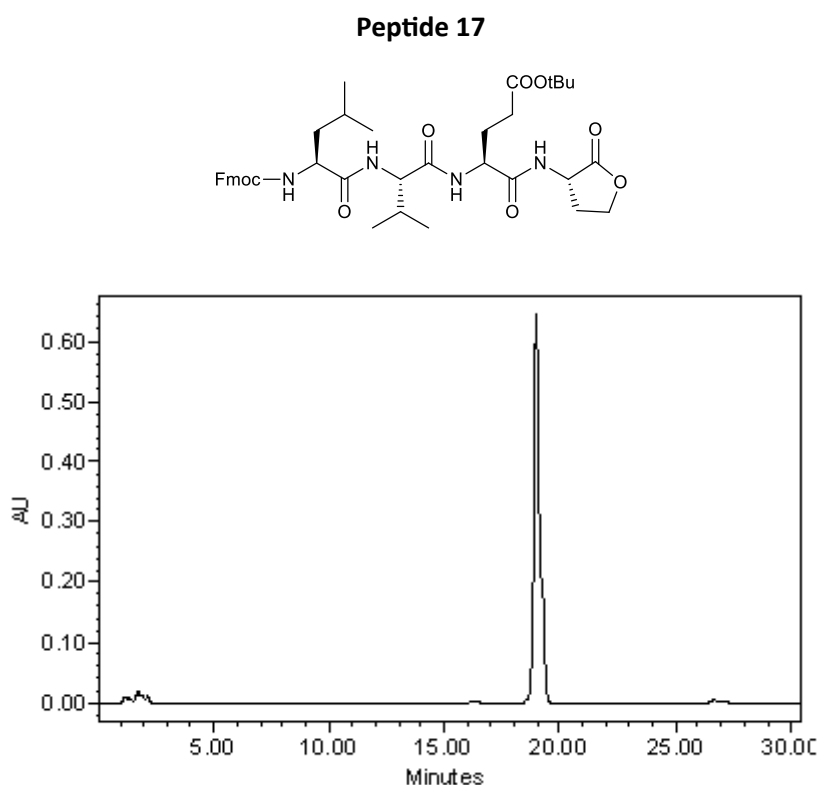

**Figure S21:** Analytical HPLC of  $\gamma$ -lactone peptide (**17**) derived from Fmoc-Leu-Val-Glu(<sup>t</sup>Bu)-Hse-OH (**16**) after acidic treatment with 0.1% TFA; column: Lichrosphere RP-18, 5  $\mu$ m, 125–4 mm; gradient: 20% to 100% AcCN in water (both containing 0.08% TFA) in 30 min; flow rate: 1 mL/min; UV detection at 265 nm; 18.9 min (**17**); The eluted peak was collected and subjected to ESI-MS:  $m/z$   $[M+H]^+$  calc. 721.38; found: 721.40.

## 4.2 $^1\text{H}/^{13}\text{C}$ -NMR data

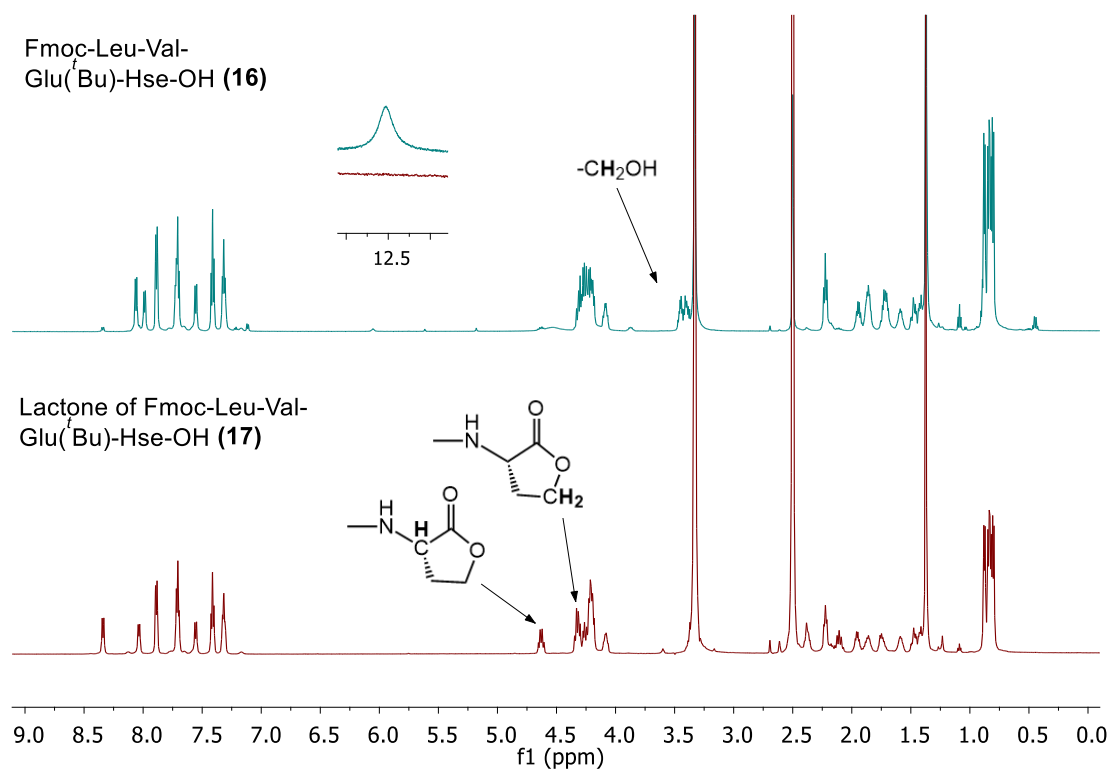

**Figure S22:**  $^1\text{H}$ -NMR (DMSO- $\text{d}_6$ ) of Fmoc-Leu-Val-Glu(<sup>t</sup>Bu)-Hse-OH (**16**) and Lactone of Fmoc-Leu-Val-Glu(<sup>t</sup>Bu)-Hse-OH (**17**).

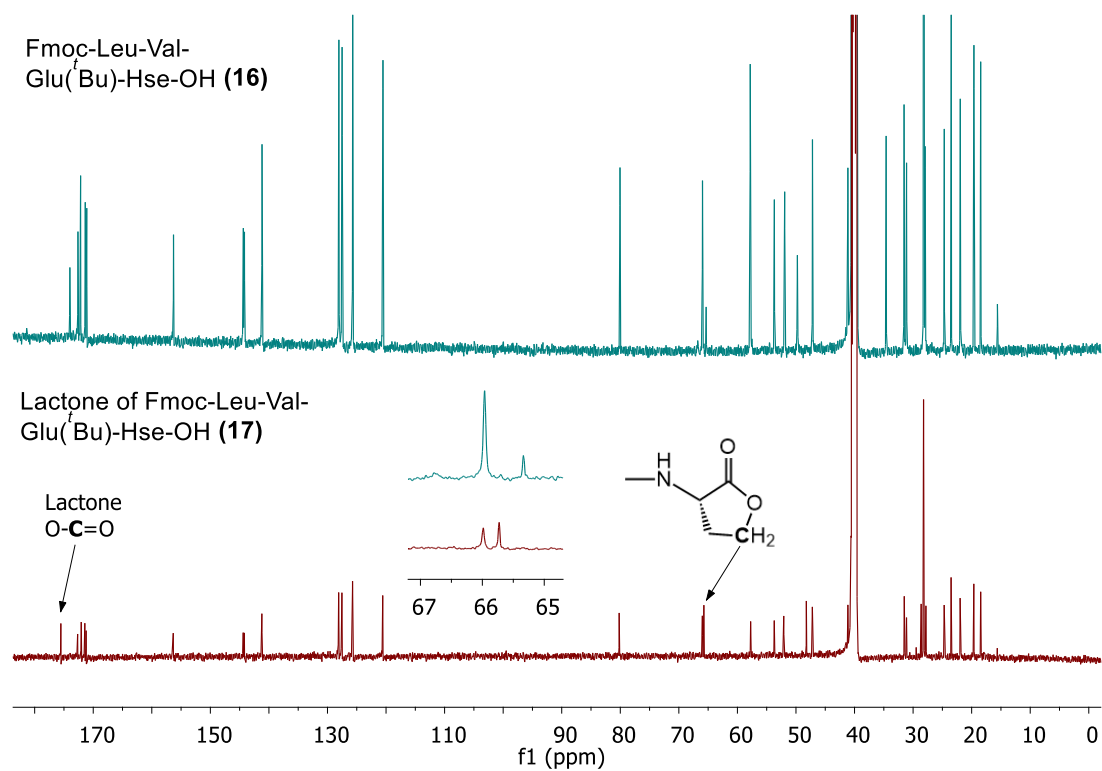

**Figure S23:**  $^1\text{H}$ -NMR ( $\text{DMSO-d}_6$ ) of Fmoc-Leu-Val-Glu(<sup>t</sup>Bu)-Hse-OH (**16**) and Lactone of Fmoc-Leu-Val-Glu(<sup>t</sup>Bu)-Hse-OH (**17**).

## 5. Racemization study during lactone formation

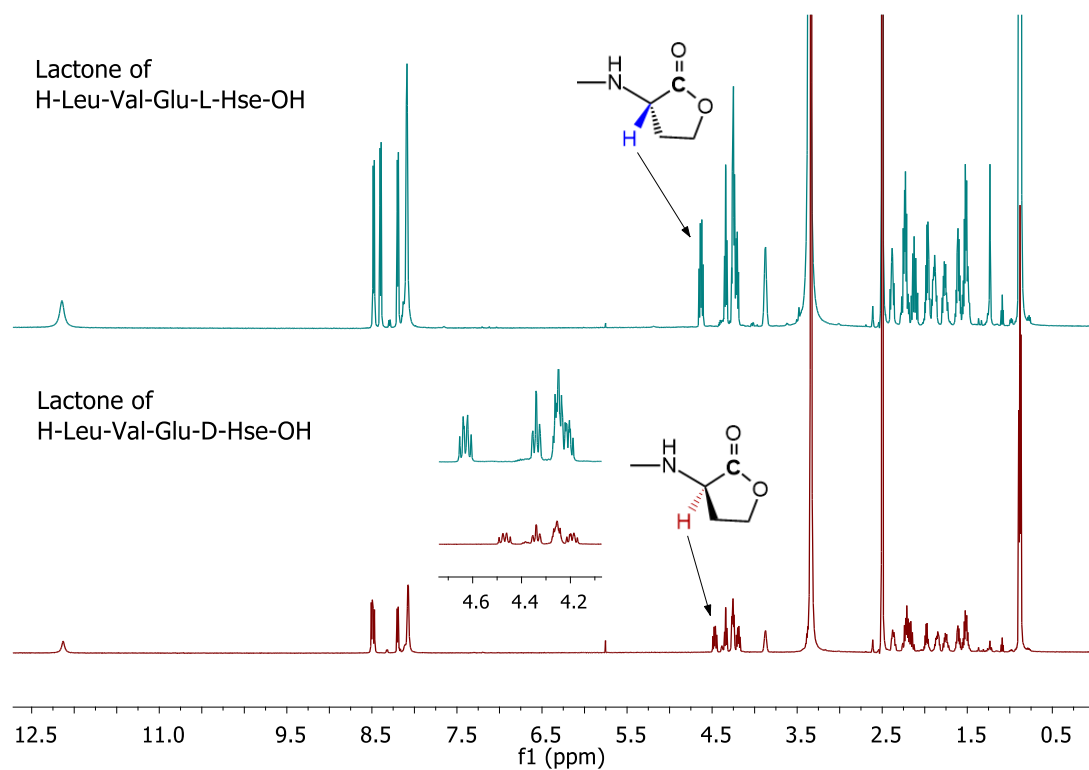

**Figure S24:**  $^1\text{H}$ -NMR ( $\text{DMSO-d}_6$ ) of H-Leu-Val-Glu-L-Hse-OH **(A)** and H-Leu-Val-Glu-D-Hse-OH **(B)**.



## 6. Treatment of resin 15 with 30% HFIP in DCM and TFE/DCM/TES (30/65/5) study

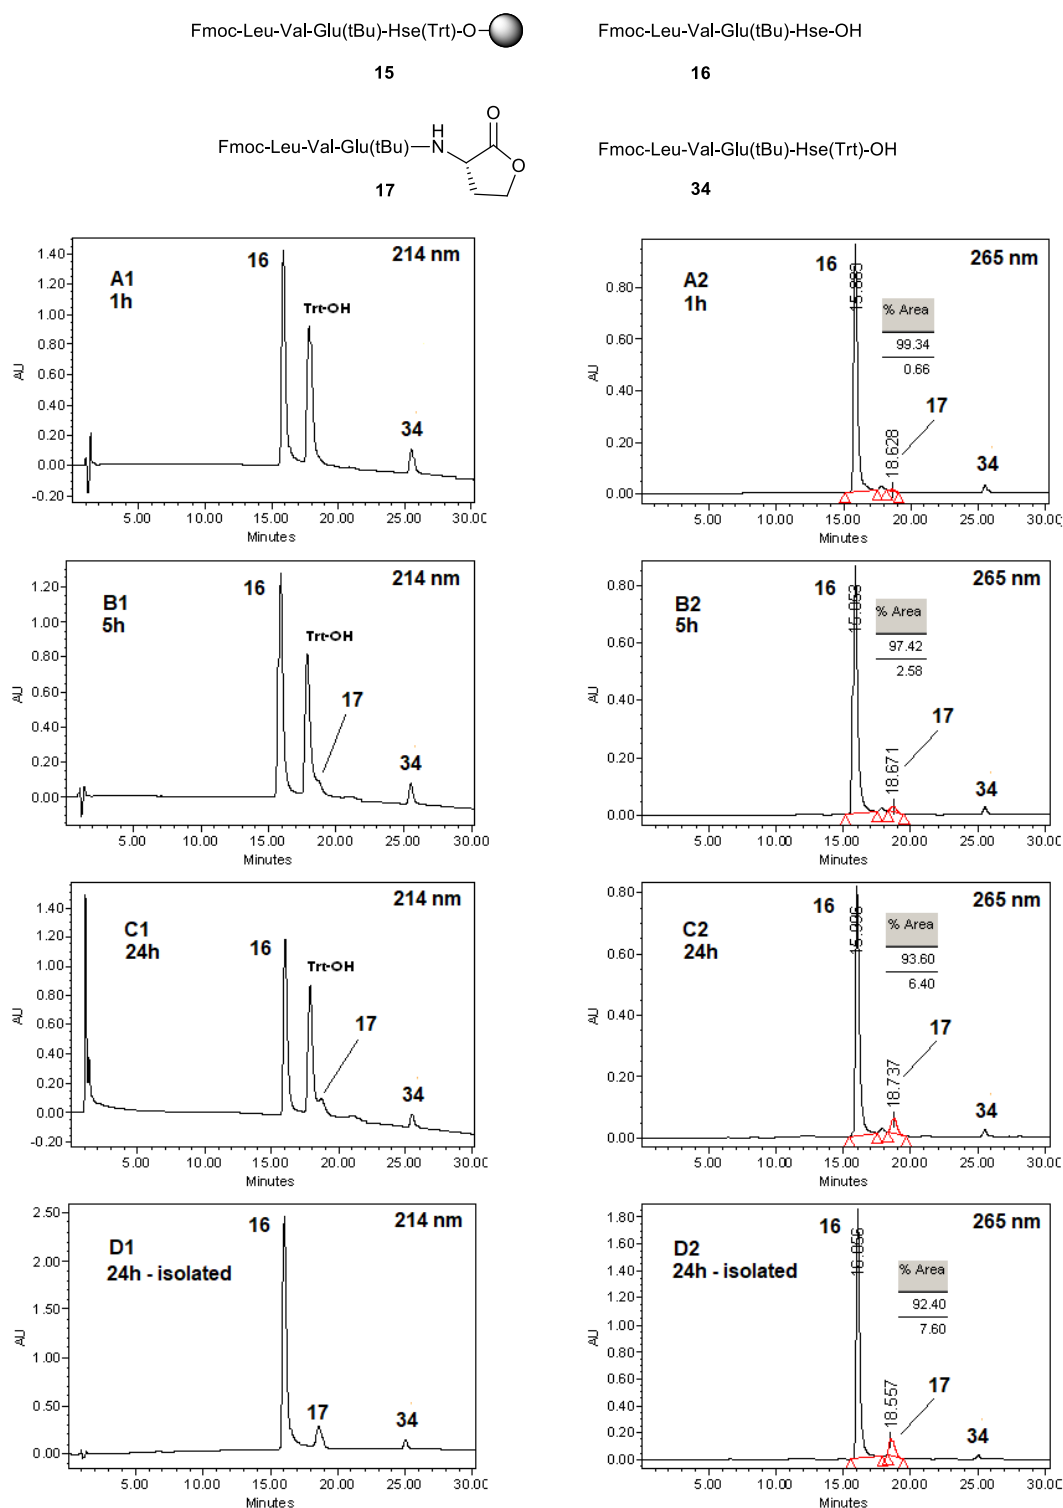

**Figure S25:** Analytical HPLC during the treatment of resin **15** with 30% HFIP (15 mL/gr resin); **(A)** at 1 h; **(B)** at 5 h; **(C)** at 24 h; **(D)** isolated solid; column: Lichrosphere RP-18, 5  $\mu$ m, 125–4 mm; gradient: 20% to 100% AcCN in water (both containing 0.08% TFA) in 30 min; flow rate: 1 mL/min; UV detection at 214 nm (**A1–D1**) and 264 nm (**A2–D2**); The eluted peaks were collected and subjected to ESI-MS. **16**: m/z  $[M+H]^+$  calc. 739.39; found: 739.40; **17**: m/z  $[M+H]^+$  calc. 721.38; found: 721.39; **34**: m/z  $[M+H]^+$  calc. 981.50; found: 981.49.

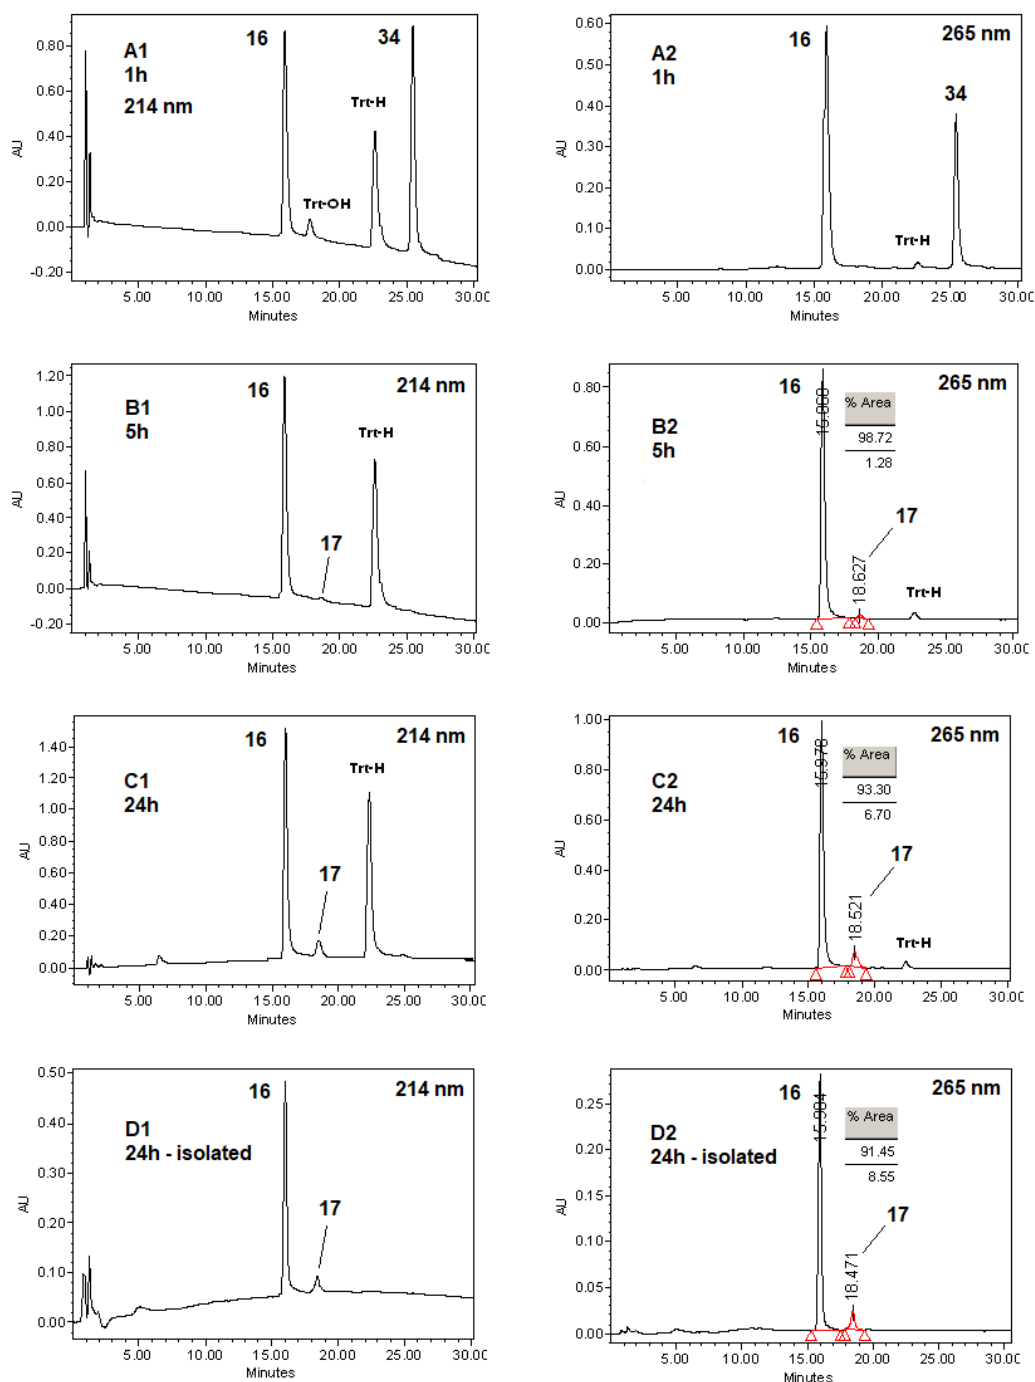

**Figure S26:** Analytical HPLC during the treatment of resin **15** with TFE/DCM/TES (30/65/5) (15 mL/gr resin); **(A)** at 1 h; **(B)** at 5 h; **(C)** at 24 h; **(D)** isolated solid; column: Lichrosphere RP-18, 5  $\mu$ m, 125–4 mm; gradient: 20% to 100% AcCN in water (both containing 0.08% TFA) in 30 min; flow rate: 1 mL/min; UV detection at 214 nm (**A1–D1**) and 264 nm (**A2–D2**); The eluted peaks were collected and subjected to/identified by ESI-MS.
